# Supplementary material for: A black-and-red stick insect from the Philippines – observations on the external anatomy and natural history of a new species of Orthomeria
Source: PubMed Central journal article supplement (PMC4768271; doi:10.3897/zookeys.559.6281), 2016-02-03
Supplement: zookeys-559-035-s001.pdf [file zookeys-559-035-s001.pdf]

**A**

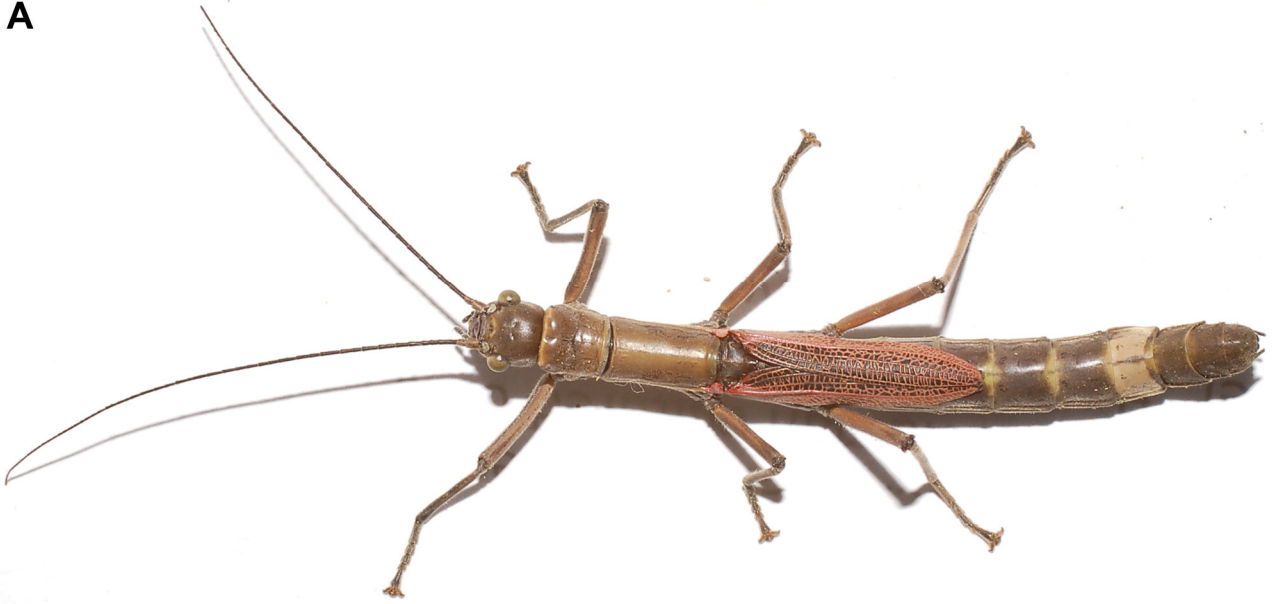

**B**

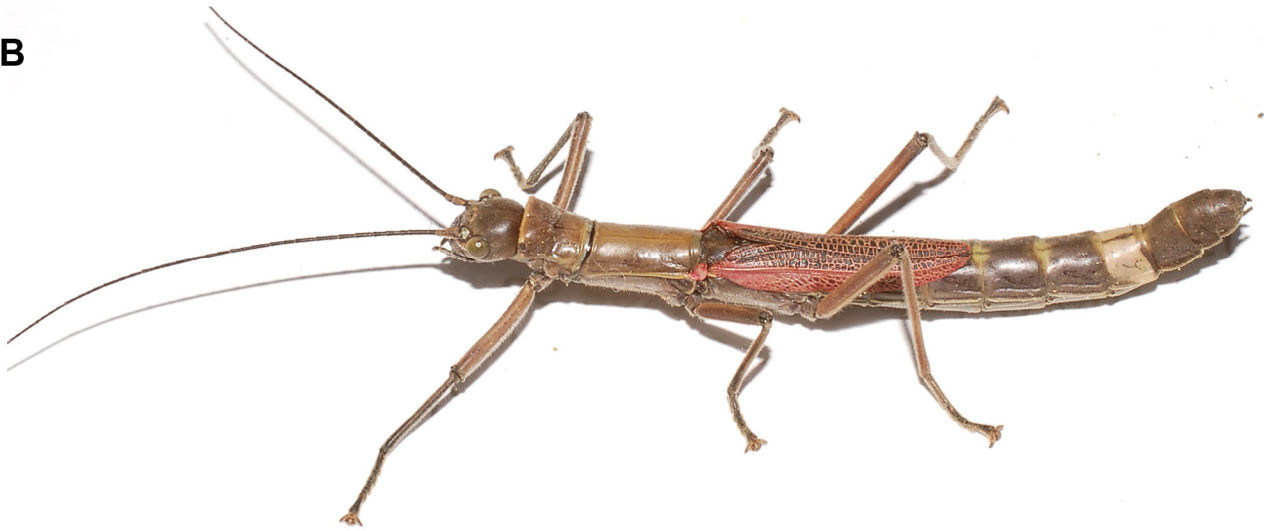

**Supplementary Figure S1.** *Orthomeria (Orthomeria) kangi* sp. n. ♀ paratype, brown colour morph  
**A** Dorsal view **B** Lateral view.
